# Supplementary material
Source: MDPI journal article supplement (https://www.mdpi.com/2076-3417/12/5/2447)

## Supplementary Materials

### Mn(II) complexes of enlarged scorpian-type azamacrocycles as mimetics of MnSOD enzyme

Mario Inclán <sup>1, \*</sup>, M. Teresa Albelda <sup>1</sup>, Salvador Blasco <sup>1</sup>, Carolina Serena <sup>2</sup>, Javier Ugarte Chicote <sup>3</sup>, Antonio García-España <sup>4</sup>, Enrique García-España <sup>1</sup>

<sup>1</sup> Molecular Science Institute, Universidad de Valencia, C/catedrático José Beltrán no. 2, 46980 Paterna, Valencia, Spain.; [teresa.albelda@uv.es](mailto:teresa.albelda@uv.es) (M.T.A.); [salvador.blasco@uv.es](mailto:salvador.blasco@uv.es) (S.B.); [enrique.garcia-es@uv.es](mailto:enrique.garcia-es@uv.es) (E.G.E.)

<sup>2</sup> Institut d'Investigació Sanitària Pere Virgili. Hospital Universitari Joan XXIII, 43005 Tarragona, Spain; [carolserena@gmail.com](mailto:carolserena@gmail.com)

<sup>3</sup> Pathology Unit, Joan XXIII University Hospital, C/Dr. Mallafrè Guasch 4, 43005 Tarragona, Spain; [jugarte@piushospital.cat](mailto:jugarte@piushospital.cat)

<sup>4</sup> Bionos Biotech, SL, Biopolo Hospital La Fe, Av. Fernando Abril Martorell 106, 46026 Valencia, Spain; [antoniojem85@gmail.com](mailto:antoniojem85@gmail.com)

\* Correspondence: [mario.inclan@uv.es](mailto:mario.inclan@uv.es); Tel.: +34-963544377

## Table of contents

|                                                                                                                |   |
|----------------------------------------------------------------------------------------------------------------|---|
| Table S1. Characterization data ( <sup>1</sup> H and <sup>13</sup> C NMR and Elemental Analysis) of L1-3 ..... | 2 |
| Figure S1. Molar distribution diagrams of the different protonated species.....                                | 3 |

**Table S1.** Characterization data ( $^1\text{H}$  and  $^{13}\text{C}$  NMR and Elemental Analysis) of **L1-3**

| Compound                                                                                             | Characterization data                                                                                                                                                                                                                                                                                                                                                                                                                                                                                                                                                                                                                                                                                                                                                                                                                                                                                                                                    |
|------------------------------------------------------------------------------------------------------|----------------------------------------------------------------------------------------------------------------------------------------------------------------------------------------------------------------------------------------------------------------------------------------------------------------------------------------------------------------------------------------------------------------------------------------------------------------------------------------------------------------------------------------------------------------------------------------------------------------------------------------------------------------------------------------------------------------------------------------------------------------------------------------------------------------------------------------------------------------------------------------------------------------------------------------------------------|
| 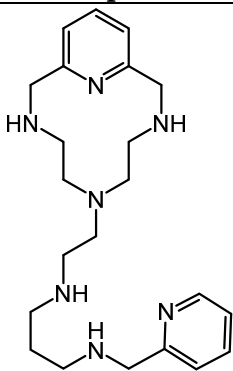 <p><b>L1</b></p>   | <p><math>^1\text{H}</math> NMR (<math>\text{D}_2\text{O}</math>, 300 MHz): <math>\delta_{\text{H}}</math> 8.83 (d, <math>J=6</math> Hz, 1H), 8.51 (t, <math>J=8</math> Hz, 1H), 8.03 (d, <math>J=8</math> Hz, 1H), 8.00 (m, 2H), 7.49 (d, <math>J=8</math> Hz, 2H), 4.69 (s, 2H), 4.68 (s, 4H), 3.34 (m, 10H), 3.10 (t, <math>J=8</math> Hz, 2H), 2.98 (m, 4H), 2.28 (m, 2H).</p> <p><math>^{13}\text{C}</math> NMR (<math>\text{D}_2\text{O}</math>, 75.43 MHz): <math>\delta_{\text{C}}</math> 149.2, 146.4, 145.5, 140.1, 127.5, 127.4, 122.6, 51.3, 50.8, 49.9, 48.9, 46.3, 45.3, 45.2, 44.0, 23.1.</p> <p><b>Anal. Calc.</b> for <math>\text{C}_{22}\text{H}_{35}\text{N}_7\cdot 5\text{HCl}\cdot 2\text{H}_2\text{O}</math>: C, 42.9; H, 7.2; N, 15.9. <b>Exp.:</b> C, 42.4; H, 7.5; N, 15.4.</p>                                                                                                                                                  |
|  <p><b>L2</b></p>  | <p><math>^1\text{H}</math> NMR (<math>\text{D}_2\text{O}</math>, 300 MHz): <math>\delta_{\text{H}}</math> 8.41 (d, <math>J=8</math> Hz, 1H), 7.97 (d, <math>J=9</math> Hz, 1H), 7.92 (d, <math>J=9</math> Hz, 1H), 7.82 (t, <math>J=8</math>, 1H), 7.77 (t, <math>J=8</math>, 1H), 7.59 (t, <math>J=8</math>, 1H), 7.50 (d, <math>J=8</math>, 1H), 7.32 (d, <math>J=8</math> Hz, 2H), 4.52 (s, 2H), 4.49 (s, 4H), 3.16 (m, 10H), 2.93 (t, <math>J=8</math> Hz, 2H), 2.78 (m, 4H), 2.12 (m, 2H).</p> <p><math>^{13}\text{C}</math> NMR (<math>\text{D}_2\text{O}</math>, 75.43 MHz): <math>\delta_{\text{C}}</math> 149.13, 148.85, 143.36, 142.84, 139.76, 133.39, 129.14, 128.71, 128.33, 124.41, 122.16, 121.03, 66.55, 50.86, 50.43, 49.66, 49.49, 45.87, 44.95, 43.55, 22.75.</p> <p><b>Anal. Calc.</b> for <math>\text{C}_{26}\text{H}_{37}\text{N}_7\cdot 5\text{HCl}</math>: C, 49.7; H, 6.7; N, 15.6. <b>Exp.:</b> C, 51.3; H, 7.5; N, 15.3.</p> |
|  <p><b>L3</b></p> | <p><math>^1\text{H}</math> NMR (<math>\text{D}_2\text{O}</math>, 300 MHz): <math>\delta_{\text{H}}</math> 7.98 (t, <math>J=8</math> Hz, 2H), 7.80 (m, 5H), 7.61 (m, <math>J=9</math> Hz, 3H), 7.31 (d, <math>J=8</math> Hz, 2H), 4.49 (s, 2H), 4.45 (s, 4H), 3.05 (m, 10H), 2.85 (m, 2H), 2.61 (t, <math>J=5</math> Hz, 4H), 1.97 (m, 2H).</p> <p><math>^{13}\text{C}</math> NMR (<math>\text{D}_2\text{O}</math>, 75.43 MHz): <math>\delta_{\text{C}}</math> 149.1, 140.1, 131.8, 130.8, 130.1, 128.8, 128.7, 128.6, 128.4, 127.3, 126.7, 126.2, 126.1, 125.0, 123.6, 123.3, 122.4, 121.48, 51.0, 50.5, 49.8, 46.1, 44.4, 43.5, 23.0.</p> <p><b>Anal. Calc.</b> for <math>\text{C}_{33}\text{H}_{40}\text{N}_6\cdot 4\text{HCl}\cdot 3\text{H}_2\text{O}</math>: C, 55.0; H, 7.0; N, 11.7. <b>Exp.:</b> C, 54.9; H, 6.9; N, 11.8.</p>                                                                                                                   |

**Figure S1.** Molar distribution diagrams of the different protonated species.

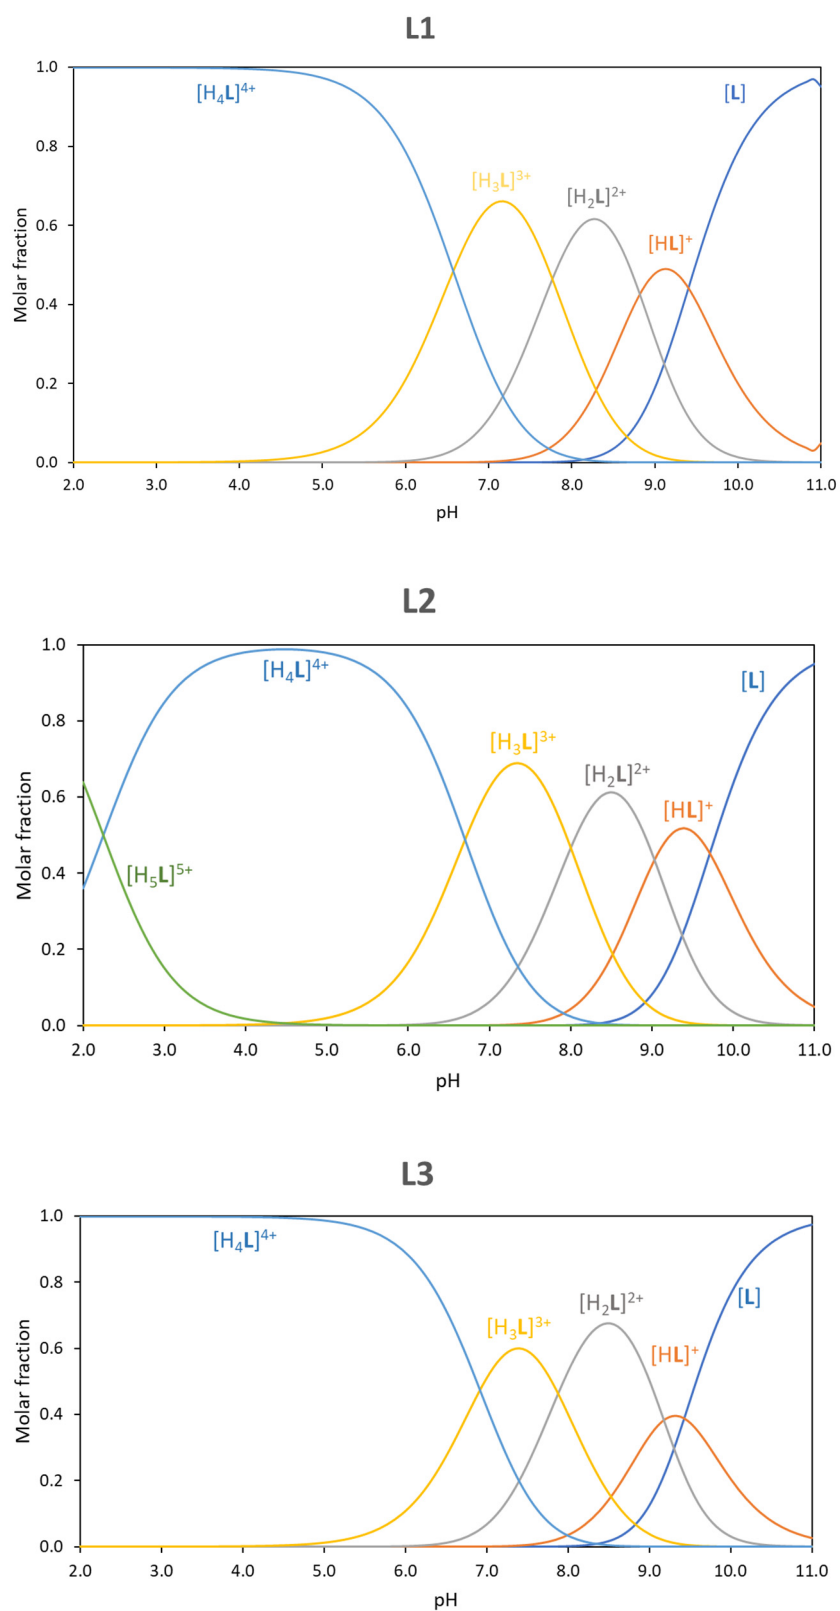

Supplement: s1 [file s1]
